# Supplementary material for: Accelerated Long-Fragment Circular PCR for Genetic Manipulation of Plant Viruses in Unveiling Functional Genomics
Source: MDPI journal article supplement (doi:10.3390/v15122332), 2023-11-28
Supplement: s1 [file s1]

## Supplementary Figures and Tables

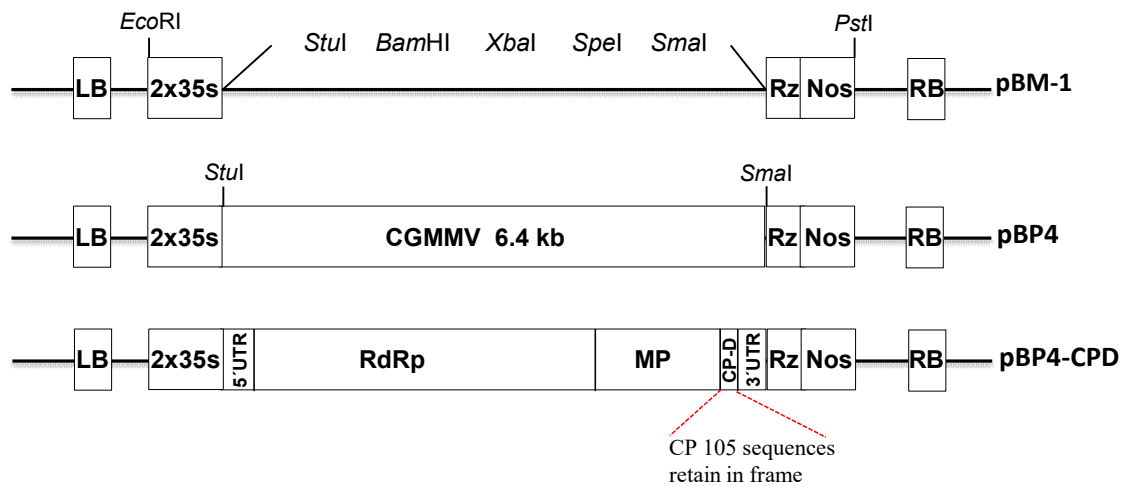

**Supplementary Figure S1: Schematic diagram of modified binary vector, CGMMV infectious clone, and partial CP deletion constructs were developed for the current studies.** pBM: The vector presence of the left border of T-DNA (LB), a double 35S promoter (2x35S), multiple cloning sites (MCS), a ribozyme sequence (Rz), a NOS terminator (NOS), and a right border of T-DNA (RB). **pBP4**: The vector contains a full-length CGMMV clone derived from pBMCG6.4(Ref:32). **pBP4-ΔCP**: The 105 bp of 5' end of CP gene sequences were retained and after sequences have been deleted up to 3' end of CP gene. (RdRp: RNA-dependent RNA polymerase, MP: Movement protein, CP: Coat protein, UTR: Untranslated region, Black line: indicates restriction enzymes as well as MCS, Red Line: indicates CP retain part).

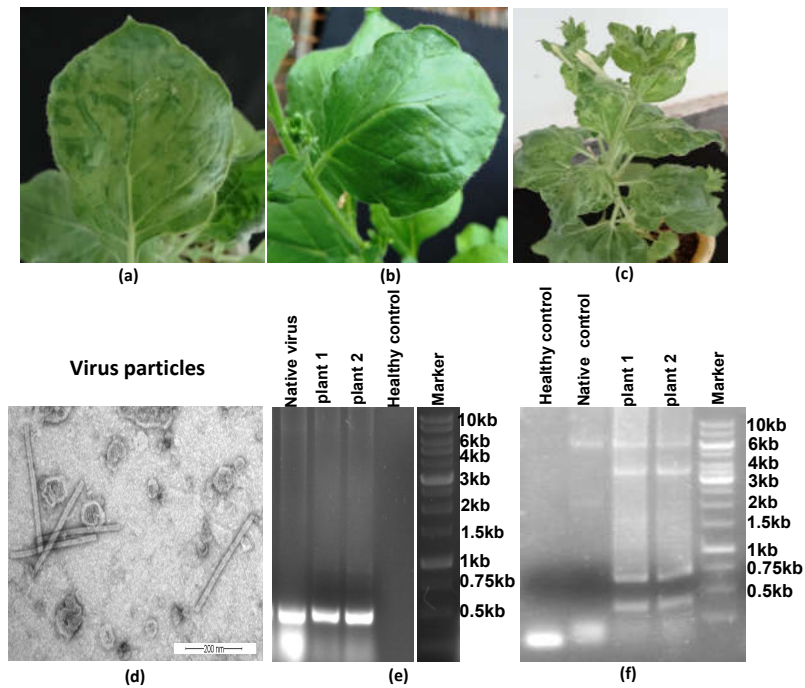

**Supplementary Figure S2: Infectivity analysis of the full-length CGMMV clone.** (a) The mottle mosaic symptoms showing in *Nicotiana benthamiana* systematic leaf with inoculation of pBMCG6.4 infectious clone, (b) Health leaf of *N. benthamiana*, (c) CGMMV purified virus inoculated leaf was showing mottle mosaic symptoms, (d) Electron micrograph showing rod-shaped particles of CGMMV in *N. benthamiana* plant inoculated with **pBP4** agro construct. Further, the infection of CGMMV **pBP4** was confirmed from the inoculated symptomatic leave samples through RT-PCR using primers specific for (e) CP gene, and (f) full-genome of CGMMV.

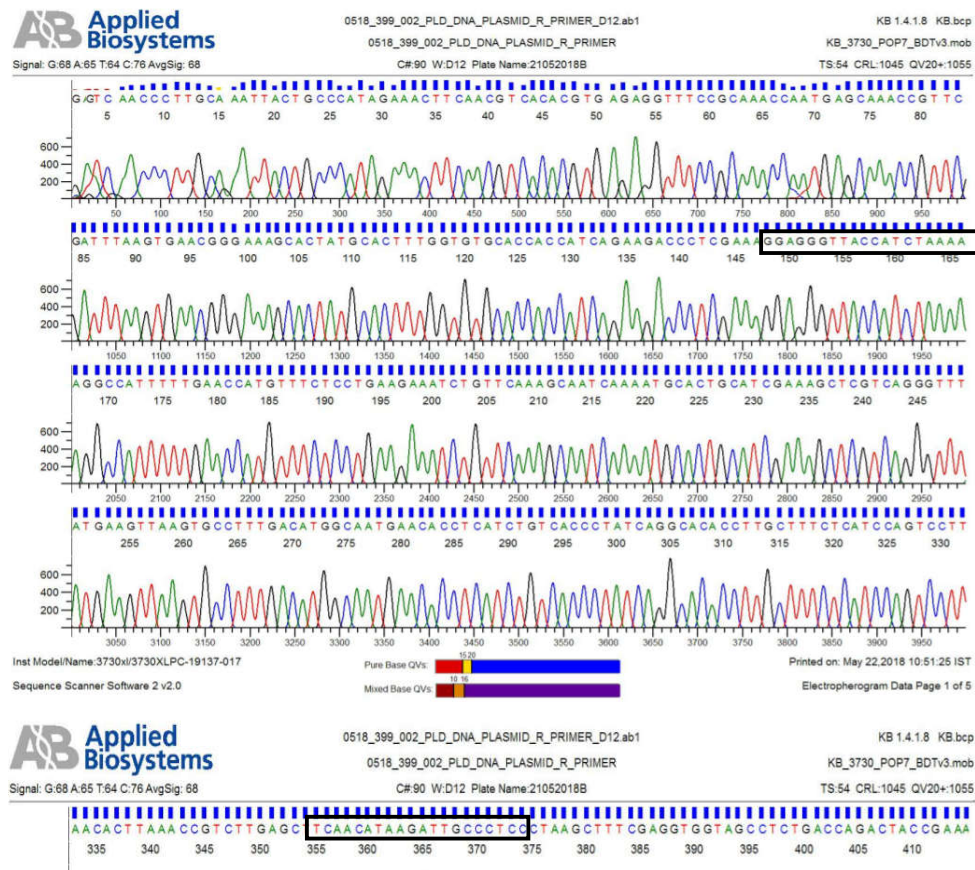

**Supplementary Figure S3: DNA sequence based confirmation of the insertion of *NbPDS* gene into CGMMV genome-based gene silencing vector (VIGS) by LC-PCR.** The dark black boxes indicate the location of PDS gene insertion in between the coat protein andUTR of CGMMV. The sequencing results show the gene insertion created at the desired location with our choice of place and without any modification, and additionally, proved that LC-PCR did not add an extra nucleotide in the CGMMV genome during the gene insertion procedure.

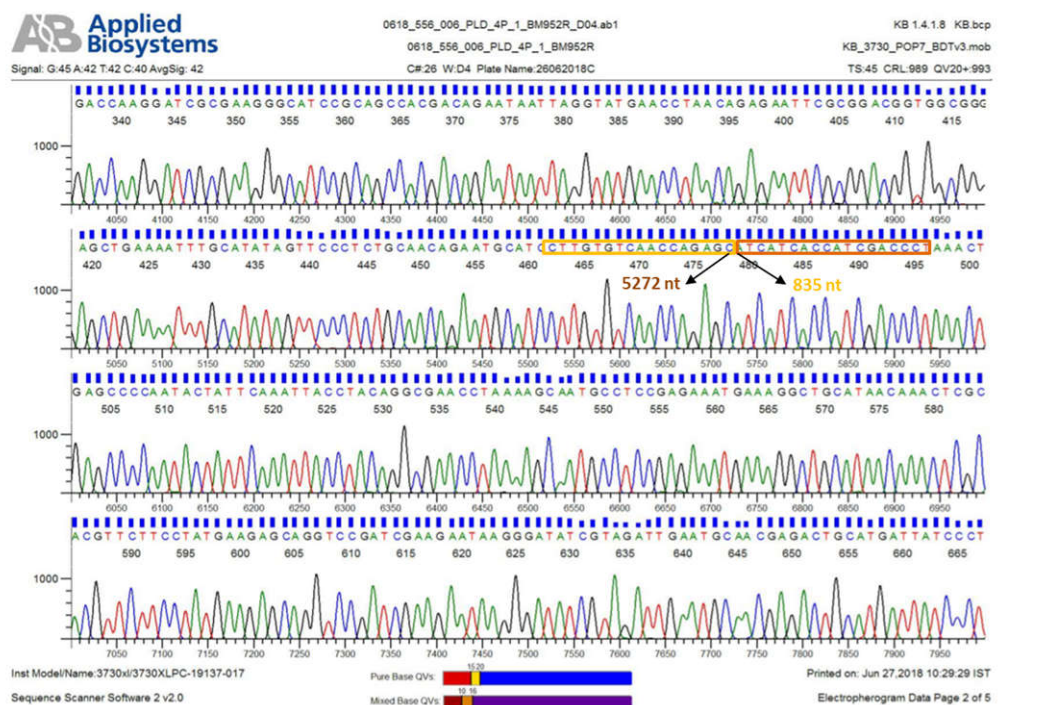

**Supplementary Figure S4: The DNA sequence-based confirmation of partial deletion of RNA-dependent RNA polymerase (RdRp) and movement protein (MP) genes from the CGMMV genome by LC-PCR. The red box indicates the start position (835nt) of RdRp deletion and the yellow box indicates the end position (5272 nt) of MP deletion. The black arrow shows the deleted genomic part.**

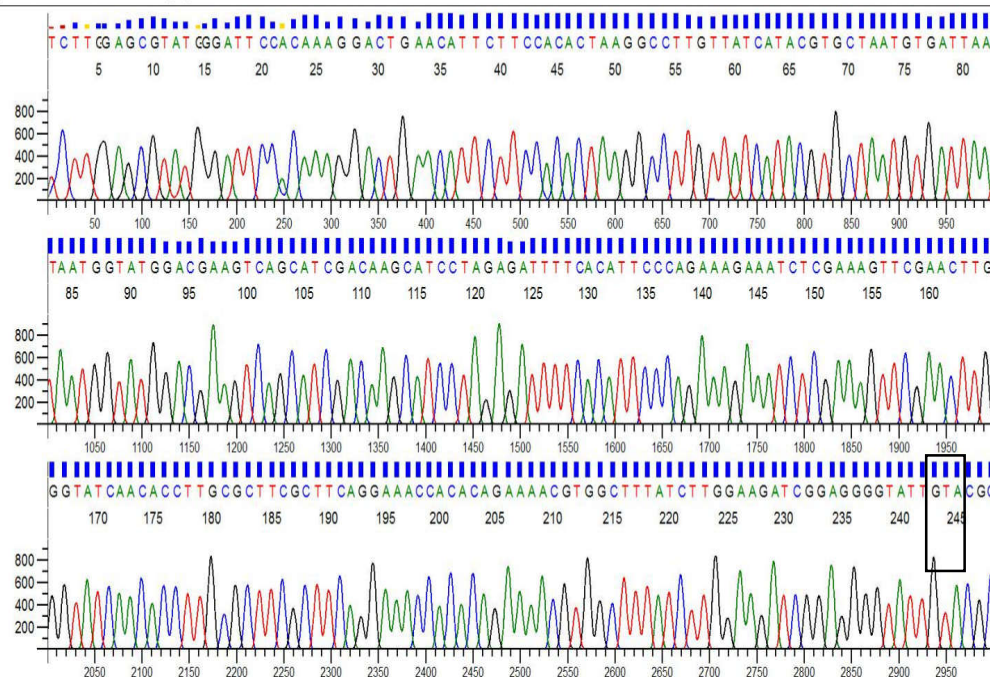

**Supplementary Figure S5: The DNA sequence confirms the single amino acid substitution (silent mutation) in the CGMMV genome by LC-PCR. The vertical black box showing the exact mutation created in the RdRP gene of CGMMV genome.**

**Supplementary Table S1:** Primers used for infectious clone development and presence of confirmation CP, NbPDS, ToLCNDV-CP, housekeeping gene of ACT1 in plant samples.

| Primer Name | Primer sequence (5'- 3')                              | Location   | Nucleotide coordinates | Expected amplicon size(kb) | Purpose                    |
|-------------|-------------------------------------------------------|------------|------------------------|----------------------------|----------------------------|
| BM 486F     | <b>CGGGATCC</b> GTTTTAATTTTAAAA TTAAAC                | 5'UTR      | 1-22                   | 6.44                       | Binary vector construction |
| BM 489R     | <b>GCTCTAGAT</b> GGGCCCTTACCCAG G                     | 3'UTR      | 6426-6442              |                            |                            |
| BM 556F     | <b>CGGGATCC</b> ATGGCTTACAATCCG ATC                   | CP         | 5763-5781              | 0.48                       | CGMMV CP detection         |
| BM 557R     | <b>CGGAATTC</b> AGCTTTCGAGGTGGT AGC                   | CP         | 6230-6248              |                            |                            |
| BM 566R     | <b>GCTCTAGAAAGCTT</b> AAGTCCTGA CGGGAACATAAGAAG       | CP         | 5808-5832              |                            | Deletion construction      |
| BM 849F     | GGTATTGTGTTGGACTCGGG                                  | ACT1       | 219-238                | 0.16                       | Semi Quantitative PCR      |
| BM 859R     | GCTGTGGTAGTGGATGAGTAAC                                | ACT1       | 361-382                |                            |                            |
| BM1013F     | CCTCACGCCCAACTAAAC                                    | Nb PDS     | 534-551                | 0.18                       | Semi Quantitative PCR      |
| BM1014R     | CAACCCAGTCTCGTACCAAT                                  | Nb PDS     | 695-715                |                            |                            |
| BM909F      | GGAGGGCAATCTTATGTTGAAGC                               | Nb PDS     | 968-990                | 0.23                       | RT-PCR detection           |
| BM910R      | AGGAGGGTTACCATCTAAAAAGG                               | Nb PDS     | 1173-1196              |                            |                            |
| BM1017F     | <b>GGATCC</b> ATGGCGAAGCGACCAGC AGA                   | ToLCNDV-CP |                        | 0.77                       | RT-PCR detection           |
| BM1018R     | <b>TCTAGAGT</b> GGTGGTGGTGGTGGT GTTAATTTGTTACCGAATCAT | ToLCNDV-CP |                        |                            |                            |
